# Supplementary material for: Neuroprotective changes in degeneration-related gene expression in the substantia nigra following acupuncture in an MPTP mouse model of Parkinsonism: Microarray analysis
Source: PubMed Central journal article supplement — Genet Mol Biol. 2014 Mar 17;38(1):115–27. doi: 10.1590/S1415-475738120140137 (PMC4415566; doi:10.1590/s1415-475738120140137), 2014-03-17
Supplement: 1415-4757-gmb-38-1-115-suppl01.pdf [file 1415-4757-gmb-38-1-115-suppl01.pdf]

**Table S1** - Up-regulated genes in MPTP-treated substantia nigral region versus control substantia nigral region.

| Probe ID | Gene symbol | Gene title                                                                              | Average fold change | Average log 2 (Fold change) | P value  |
|----------|-------------|-----------------------------------------------------------------------------------------|---------------------|-----------------------------|----------|
| 10469058 | Ucma        | upper zone of growth plate and cartilage matrix associated                              | 1.370849            | 0.45506978                  | 0.01185  |
| 10547995 | Tuba3a      | tubulin, alpha 3A                                                                       | 1.355087            | 0.43838501                  | 0.007448 |
| 10415353 | Tssk4       | testis-specific serine kinase 4                                                         | 1.318758            | 0.399180174                 | 0.028788 |
| 10520706 | Trim54      | tripartite motif-containing 54                                                          | 1.318023            | 0.398375034                 | 0.013562 |
| 10353438 | Tram2       | translocating chain-associating membrane protein 2                                      | 1.398238            | 0.483609915                 | 0.009858 |
| 10372443 | Tph2        | tryptophan hydroxylase 2                                                                | 1.735757            | 0.79556489                  | 0.006941 |
| 10355528 | Tns1        | tensin 1                                                                                | 1.42786             | 0.513854742                 | 0.00437  |
| 10519060 | Tnfrsf14    | tumor necrosis factor receptor superfamily, member 14 (herpesvirus entry mediator)      | 1.396756            | 0.482079983                 | 0.022391 |
| 10498273 | Tm4sf1      | transmembrane 4 superfamily member 1                                                    | 1.324548            | 0.405500174                 | 0.049599 |
| 10529636 | Stk32b      | serine/threonine kinase 32B                                                             | 1.333922            | 0.415674686                 | 0.018253 |
| 10591556 | Spc24       | SPC24, NDC80 kinetochore complex component, homolog ( <i>S. cerevisiae</i> )            | 1.496182            | 0.581285238                 | 0.02509  |
| 10507719 | Slfn1       | schlafen like 1                                                                         | 1.356788            | 0.440194845                 | 0.018089 |
| 10378816 | Slc6a4      | solute carrier family 6 (neurotransmitter transporter, serotonin), member 4             | 1.457832            | 0.543824911                 | 0.016635 |
| 10597960 | Slc6a20a    | solute carrier family 6 (neurotransmitter transporter), member 20A                      | 1.56813             | 0.649044991                 | 0.015262 |
| 10541318 | Slc6a13     | solute carrier family 6 (neurotransmitter transporter, GABA), member 13                 | 1.527296            | 0.610980034                 | 0.011258 |
| 10386683 | Slc47a1     | solute carrier family 47, member 1                                                      | 1.53985             | 0.622790098                 | 0.037646 |
| 10501811 | Slc44a3     | solute carrier family 44, member 3                                                      | 1.349725            | 0.43266511                  | 0.022073 |
| 10461130 | Slc22a6     | solute carrier family 22 (organic anion transporter), member 6                          | 1.3087              | 0.388134956                 | 0.044758 |
| 10552857 | Slc17a7     | solute carrier family 17 (sodium-dependent inorganic phosphate cotransporter), member 7 | 1.468654            | 0.554494858                 | 0.018079 |
| 10550593 | Six5        | sine oculis-related homeobox 5                                                          | 1.490436            | 0.575734854                 | 0.009845 |
| 10484463 | Serping1    | serine (or cysteine) peptidase inhibitor, clade G, member 1                             | 1.382563            | 0.467345238                 | 0.042157 |
| 10493794 | S100a14     | S100 calcium binding protein A14                                                        | 1.568956            | 0.64980495                  | 0.045956 |
| 10602966 | Rs1         | retinoschisis (X-linked, juvenile) 1 (human)                                            | 1.520315            | 0.604370117                 | 0.032478 |
| 10344723 | Rrs1        | RRS1 ribosome biogenesis regulator homolog ( <i>S. cerevisiae</i> )                     | 1.378147            | 0.462729931                 | 0.016078 |
| 10367041 | Rdh9        | retinol dehydrogenase 9                                                                 | 1.385397            | 0.470299959                 | 0.043342 |
| 10556059 | Rbmx12      | RNA binding motif protein, X-linked-like 2                                              | 1.323988            | 0.40489006                  | 0.030269 |
| 10422946 | Ranbp3l     | RAN binding protein 3-like                                                              | 1.607697            | 0.684995174                 | 0.009315 |
| 10445633 | Prph2       | peripherin 2                                                                            | 1.349996            | 0.432954788                 | 0.0255   |
| 10473450 | Olfir998    | olfactory receptor 998                                                                  | 1.466381            | 0.552259922                 | 0.03908  |

|          |              |                                                                                   |          |             |          |
|----------|--------------|-----------------------------------------------------------------------------------|----------|-------------|----------|
| 10566296 | Olfr642      | olfactory receptor 642                                                            | 1.310929 | 0.390590072 | 0.039626 |
| 10544403 | Olfr459      | olfactory receptor 459                                                            | 1.458373 | 0.544360042 | 0.011498 |
| 10537803 | Olfr448      | olfactory receptor 448                                                            | 1.359942 | 0.443544984 | 2.63E-04 |
| 10351903 | Olfr420      | olfactory receptor 420                                                            | 1.307295 | 0.386584997 | 0.012782 |
| 10376412 | Olfr314      | olfactory receptor 314                                                            | 1.401965 | 0.487450123 | 0.021474 |
| 10565399 | Olfr294      | olfactory receptor 294                                                            | 1.327521 | 0.408734918 | 0.020398 |
| 10432129 | Olfr288      | olfactory receptor 288                                                            | 1.77269  | 0.825939894 | 0.042144 |
| 10440158 | Olfr191      | olfactory receptor 191                                                            | 1.541815 | 0.624629915 | 0.044143 |
| 10405063 | Ogn          | osteoglycin                                                                       | 1.953315 | 0.965924978 | 0.012938 |
| 10574161 | Nlrc5        | NLR family, CARD domain containing 5                                              | 1.40577  | 0.491360188 | 0.048339 |
| 10349993 | Myog         | myogenin                                                                          | 1.304381 | 0.383364916 | 0.047116 |
| 10399421 | Mycn         | v-myc myelocytomatosis viral related oncogene, neuroblastoma derived (avian)      | 1.313312 | 0.393209934 | 0.00864  |
| 10584827 | Mpzl2        | myelin protein zero-like 2                                                        | 1.547222 | 0.629680157 | 0.00967  |
| 10499512 | Mir92b       | microRNA 92b                                                                      | 1.300598 | 0.379174948 | 0.008433 |
| 10434804 | Mir28        | microRNA 28                                                                       | 1.581842 | 0.66160512  | 0.004448 |
| 10460829 | Mir194-2     | microRNA 194-2                                                                    | 1.453595 | 0.539625168 | 0.049373 |
| 10532169 | Mfsd7a       | major facilitator superfamily domain containing 7A                                | 1.370607 | 0.454815149 | 0.00524  |
| 10429506 | Lypd2        | Ly6/Plaur domain containing 2                                                     | 1.385767 | 0.470685005 | 0.036528 |
| 10504761 | LOC641050    | uncharacterized protein LOC641050                                                 | 1.313722 | 0.393660069 | 0.033307 |
| 10504753 | LOC641050    | uncharacterized protein LOC641050                                                 | 1.364517 | 0.448390126 | 0.025779 |
| 10373016 | LOC100504608 | protein FAM119B-like                                                              | 1.395445 | 0.48072505  | 0.0414   |
| 10569288 | Krtap5-4     | keratin associated protein 5-4                                                    | 1.318073 | 0.398430109 | 0.002074 |
| 10432918 | Krt8         | keratin 8                                                                         | 1.322254 | 0.402999878 | 0.035143 |
| 10552608 | Klk1b3       | kallikrein 1-related peptidase b3                                                 | 1.620597 | 0.696525037 | 0.03014  |
| 10601867 | Kir3dl1      | killer cell immunoglobulin-like receptor, three domains, long cytoplasmic tail, 1 | 1.495134 | 0.580275059 | 3.96E-04 |
| 10480003 | Itih2        | inter-alpha trypsin inhibitor, heavy chain 2                                      | 1.355613 | 0.438945055 | 0.02437  |
| 10402991 | Igh-VX24     | immunoglobulin heavy chain (X24 family)                                           | 1.397269 | 0.482609987 | 0.022955 |
| 10450372 | Hspa11       | heat shock protein 1-like                                                         | 1.546922 | 0.629400015 | 0.018308 |
| 10531645 | Hnrpdl       | heterogeneous nuclear ribonucleoprotein D-like                                    | 1.358882 | 0.442420006 | 0.008815 |
| 10369735 | Herc4        | hect domain and RLD 4                                                             | 1.35651  | 0.43990016  | 0.007765 |
| 10582188 | Gse1         | genetic suppressor element 1                                                      | 1.32593  | 0.407005072 | 0.04699  |
| 10533725 | Gpr81        | G protein-coupled receptor 81                                                     | 1.325126 | 0.406129837 | 0.031722 |
| 10460782 | Gpha2        | glycoprotein hormone alpha 2                                                      | 1.319476 | 0.399965048 | 0.024431 |
| 10554221 | Gm9885       | predicted gene 9885                                                               | 1.559648 | 0.641220212 | 0.034653 |
| 10585543 | Gm7444       | ring finger protein 19A pseudogene                                                | 1.402956 | 0.488470078 | 0.030915 |
| 10580516 | Gm6625       | predicted gene 6625                                                               | 1.416165 | 0.501989841 | 0.015037 |

|          |               |                                                                                               |          |             |          |
|----------|---------------|-----------------------------------------------------------------------------------------------|----------|-------------|----------|
| 10607465 | Gm4997        | predicted gene 4997                                                                           | 1.499987 | 0.584950209 | 0.020923 |
| 10510225 | Gm13235       | predicted gene 13235                                                                          | 1.713125 | 0.776630044 | 0.04373  |
| 10510170 | Gm13235       | predicted gene 13235                                                                          | 1.713125 | 0.776630044 | 0.04373  |
| 10404339 | Gm11360       | dynein, axonemal, heavy chain 9 pseudogene                                                    | 1.337784 | 0.419845104 | 0.014737 |
| 10436890 | Gm10785       | predicted gene 10785                                                                          | 1.557298 | 0.639045    | 0.023735 |
| 10487619 | Gm10183       | predicted gene 10183                                                                          | 1.312339 | 0.392139912 | 0.03056  |
| 10366368 | Glipr112      | GLI pathogenesis-related 1 like 2                                                             | 1.427989 | 0.513984919 | 0.017321 |
| 10594758 | Gcnt3         | glucosaminyl (N-acetyl) transferase 3, mucin type                                             | 1.377837 | 0.462404966 | 0.01679  |
| 10397346 | Fos           | FBJ osteosarcoma oncogene                                                                     | 1.628428 | 0.703480005 | 0.019194 |
| 10481262 | Fcnb          | ficolin B                                                                                     | 1.442454 | 0.528525114 | 0.027446 |
| 10570606 | Defb14        | defensin beta 14                                                                              | 1.366769 | 0.450769901 | 0.025805 |
| 10507152 | Cyp4a12b      | cytochrome P450, family 4, subfamily a, polypeptide 12B                                       | 1.486583 | 0.572000027 | 0.036575 |
| 10551293 | Cyp2f2        | cytochrome P450, family 2, subfamily f, polypeptide 2                                         | 1.53003  | 0.613560081 | 0.03154  |
| 10380297 | Cox11         | COX11 homolog, cytochrome c oxidase assembly protein (yeast)                                  | 1.344207 | 0.426754951 | 0.033132 |
| 10575052 | Cdh1          | cadherin 1                                                                                    | 1.62967  | 0.70457983  | 0.001501 |
| 10346783 | Cd28          | CD28 antigen                                                                                  | 1.304684 | 0.383700013 | 0.021589 |
| 10389072 | Cct6b         | chaperonin containing Tcp1, subunit 6b (zeta)                                                 | 1.443864 | 0.529935002 | 0.048596 |
| 10411527 | Cartpt        | CART prepropeptide                                                                            | 1.341294 | 0.423624992 | 0.044706 |
| 10450242 | C4b           | complement component 4B (Chido blood group)                                                   | 1.381227 | 0.465950012 | 0.038342 |
| 10410475 | BC018507      | cDNA sequence BC018507                                                                        | 1.307463 | 0.386769772 | 0.010261 |
| 10450412 | AU023871      | expressed sequence AU023871                                                                   | 1.319009 | 0.399454951 | 0.020676 |
| 10365637 | Arl1          | ADP-ribosylation factor-like 1                                                                | 1.33243  | 0.414060116 | 0.00691  |
| 10425049 | Apol9b        | apolipoprotein L 9b                                                                           | 1.320945 | 0.401570082 | 0.040158 |
| 10382189 | Apoh          | apolipoprotein H                                                                              | 1.312089 | 0.391865134 | 0.006738 |
| 10546430 | Adamts9       | a disintegrin-like and metallopeptidase (reprolysin type) with thrombospondin type 1 motif, 9 | 1.349579 | 0.432509899 | 0.003226 |
| 10447239 | Abcg8         | ATP-binding cassette, sub-family G (WHITE), member 8                                          | 1.308324 | 0.387720108 | 0.002602 |
| 10438442 | A930003A15Rik | RIKEN cDNA A930003A15 gene                                                                    | 1.311447 | 0.391160011 | 0.022121 |
| 10568865 | 6430531B16Rik | RIKEN cDNA 6430531B16 gene                                                                    | 1.419709 | 0.505595207 | 0.033218 |
| 10599342 | 6030498E09Rik | RIKEN cDNA 6030498E09 gene                                                                    | 1.711498 | 0.775259972 | 0.038857 |
| 10431946 | 5830453K13Rik | RIKEN cDNA 5830453K13 gene                                                                    | 1.316822 | 0.397059798 | 0.011451 |
| 10531479 | 4932430I15Rik | RIKEN cDNA 4932430I15 gene                                                                    | 1.350038 | 0.432999969 | 0.03692  |
| 10545524 | 4931417E11Rik | RIKEN cDNA 4931417E11 gene                                                                    | 1.428771 | 0.514775038 | 0.033142 |
| 10605651 | 4930415L06Rik | RIKEN cDNA 4930415L06 gene                                                                    | 1.606182 | 0.683634996 | 0.032499 |
| 10484256 | 4930401B11Rik | RIKEN cDNA 4930401B11 gene                                                                    | 1.466676 | 0.552550077 | 0.027011 |
| 10397538 | 1810035L17Rik | RIKEN cDNA 1810035L17 gene                                                                    | 1.308501 | 0.387915134 | 0.02803  |
| 10399389 | 1700034J04Rik | RIKEN cDNA 1700034J04 gene                                                                    | 1.540304 | 0.623215079 | 0.025798 |

|          |               |                            |          |              |          |
|----------|---------------|----------------------------|----------|--------------|----------|
| 10479058 | 1700021F07Rik | RIKEN cDNA 1700021F07 gene | 1.391379 | 0.476515055  | 0.027232 |
| 10338184 | ---           | ---                        | 1.812945 | 0.85833478   | 0.020253 |
| 10338317 | ---           | ---                        | 1.605285 | 0.682829857  | 0.025985 |
| 10338391 | ---           | ---                        | 1.724873 | 0.786489964  | 0.021293 |
| 10338427 | ---           | ---                        | 1.476468 | 0.56215024   | 0.001343 |
| 10338448 | ---           | ---                        | 1.783251 | 0.834509969  | 0.023987 |
| 10338456 | ---           | ---                        | 1.733617 | 0.793784857  | 0.01089  |
| 10338507 | ---           | ---                        | 1.59359  | 0.672280073  | 0.027407 |
| 10338591 | ---           | ---                        | 1.872357 | 0.904855251  | 0.005571 |
| 10338602 | ---           | ---                        | 1.3623   | 0.446044922  | 0.01494  |
| 10338657 | ---           | ---                        | 1.571372 | 0.652024984  | 0.009592 |
| 10338748 | ---           | ---                        | 1.32034  | 0.400909901  | 0.047195 |
| 10338779 | ---           | ---                        | 1.373789 | 0.458159924  | 0.017361 |
| 10338863 | ---           | ---                        | 2.699749 | 1.432825208  | 0.049832 |
| 10338889 | ---           | ---                        | 3.106037 | 1.635075092  | 0.013942 |
| 10338936 | ---           | ---                        | 2.198074 | 1.136240125  | 0.019201 |
| 10338957 | ---           | ---                        | 1.349977 | 0.432934761  | 0.046669 |
| 10338989 | ---           | ---                        | 2.064604 | 1.045864999  | 0.029468 |
| 10339267 | ---           | ---                        | 1.55975  | 0.641314983  | 0.048801 |
| 10339308 | ---           | ---                        | 1.849711 | 0.887300253  | 0.030691 |
| 10339355 | ---           | ---                        | 1.334293 | 0.416074991  | 0.014895 |
| 10339444 | ---           | ---                        | 2.297731 | 1.200210094  | 0.004966 |
| 10339505 | ---           | ---                        | 1.496954 | 0.582030058  | 0.046597 |
| 10339560 | ---           | ---                        | 1.334468 | 0.41626507   | 0.01795  |
| 10339599 | ---           | ---                        | 1.497639 | 0.582689762  | 0.014255 |
| 10339734 | ---           | ---                        | 1.415258 | 0.501065016  | 0.035849 |
| 10339744 | ---           | ---                        | 1.657432 | 0.728949904  | 0.013787 |
| 10339946 | ---           | ---                        | 1.539839 | 0.622779965  | 0.026659 |
| 10339949 | ---           | ---                        | 1.71744  | 0.780260086  | 0.022276 |
| 10340014 | ---           | ---                        | 1.411423 | 0.497149944  | 0.008355 |
| 10340162 | ---           | ---                        | 1.473243 | 0.558995008  | 0.039729 |
| 10340185 | ---           | ---                        | 1.474484 | 0.560209751  | 0.02925  |
| 10340239 | ---           | ---                        | 2.040998 | 1.02927494   | 1.78E-04 |
| 10340263 | ---           | ---                        | 1.799916 | 0.847929955  | 3.40E-04 |
| 10340310 | ---           | ---                        | 1.673914 | 0.743224978  | 0.025166 |
| 10340326 | ---           | ---                        | 1.393246 | 0.4784449821 | 0.00266  |
| 10340346 | ---           | ---                        | 2.079562 | 1.056280017  | 0.033719 |
| 10340364 | ---           | ---                        | 1.65337  | 0.725409865  | 0.008272 |
| 10340368 | ---           | ---                        | 1.861254 | 0.896275282  | 0.026863 |
| 10340546 | ---           | ---                        | 1.430689 | 0.516709805  | 0.044891 |

|          |     |     |          |             |          |
|----------|-----|-----|----------|-------------|----------|
| 10340700 | --- | --- | 1.353636 | 0.436840057 | 0.03687  |
| 10340866 | --- | --- | 1.407388 | 0.493020058 | 0.049769 |
| 10340869 | --- | --- | 1.352422 | 0.435544968 | 0.032703 |
| 10340949 | --- | --- | 2.085973 | 1.060720205 | 0.018324 |
| 10341069 | --- | --- | 1.674871 | 0.744050145 | 0.00928  |
| 10341084 | --- | --- | 2.383316 | 1.25296998  | 0.010827 |
| 10341113 | --- | --- | 1.842181 | 0.881415129 | 0.021909 |
| 10341131 | --- | --- | 1.847975 | 0.885945082 | 0.018775 |
| 10341157 | --- | --- | 1.658673 | 0.730029821 | 0.011273 |
| 10341253 | --- | --- | 1.336255 | 0.418195248 | 0.048286 |
| 10341344 | --- | --- | 1.724849 | 0.786469936 | 0.043221 |
| 10341402 | --- | --- | 2.19908  | 1.136900187 | 0.029531 |
| 10341420 | --- | --- | 1.30415  | 0.383110046 | 0.047312 |
| 10341422 | --- | --- | 1.311656 | 0.391389847 | 0.021195 |
| 10341463 | --- | --- | 1.506719 | 0.591410041 | 0.030764 |
| 10341577 | --- | --- | 1.311338 | 0.391039848 | 0.040125 |
| 10341620 | --- | --- | 1.964681 | 0.974295139 | 0.032495 |
| 10341692 | --- | --- | 1.513711 | 0.598089874 | 0.02702  |
| 10341816 | --- | --- | 1.389769 | 0.474845171 | 0.042428 |
| 10341833 | --- | --- | 1.681606 | 0.749840021 | 0.014337 |
| 10341862 | --- | --- | 3.033325 | 1.600899935 | 0.002128 |
| 10342089 | --- | --- | 1.318662 | 0.399075031 | 0.032942 |
| 10342164 | --- | --- | 1.307046 | 0.386310101 | 5.94E-04 |
| 10342239 | --- | --- | 1.869886 | 0.902950048 | 0.044075 |
| 10342240 | --- | --- | 2.1628   | 1.112900019 | 0.019963 |
| 10342273 | --- | --- | 1.631818 | 0.706480026 | 0.028191 |
| 10342299 | --- | --- | 2.04724  | 1.033679962 | 0.040167 |
| 10342370 | --- | --- | 1.588687 | 0.667834997 | 0.046557 |
| 10342431 | --- | --- | 1.738617 | 0.797940016 | 3.60E-04 |
| 10342548 | --- | --- | 1.442354 | 0.528425694 | 0.012855 |
| 10342668 | --- | --- | 1.492566 | 0.577795029 | 0.045275 |
| 10342730 | --- | --- | 1.634319 | 0.708689928 | 0.040195 |
| 10342770 | --- | --- | 1.503589 | 0.588410139 | 0.048278 |
| 10342771 | --- | --- | 1.576592 | 0.656809807 | 0.037307 |
| 10342960 | --- | --- | 2.321561 | 1.215095043 | 0.032701 |
| 10343049 | --- | --- | 1.74391  | 0.802325249 | 0.019259 |
| 10343150 | --- | --- | 1.673989 | 0.743289948 | 0.035481 |
| 10343353 | --- | --- | 1.329234 | 0.41059494  | 0.037767 |
| 10343377 | --- | --- | 2.197785 | 1.136049986 | 0.029744 |
| 10343396 | --- | --- | 1.355834 | 0.439180374 | 0.018024 |

|          |     |     |          |             |          |
|----------|-----|-----|----------|-------------|----------|
| 10343410 | --- | --- | 1.366798 | 0.450799942 | 0.046624 |
| 10343440 | --- | --- | 1.727966 | 0.789074898 | 0.046091 |
| 10343510 | --- | --- | 1.630676 | 0.705470085 | 0.045568 |
| 10343531 | --- | --- | 1.598169 | 0.676420212 | 0.028192 |
| 10343533 | --- | --- | 4.068114 | 2.024359941 | 0.007503 |
| 10343539 | --- | --- | 3.017942 | 1.593565106 | 0.017486 |
| 10343561 | --- | --- | 1.35418  | 0.437419891 | 0.039577 |
| 10343645 | --- | --- | 3.139664 | 1.65060997  | 0.021878 |
| 10343743 | --- | --- | 2.392261 | 1.258374929 | 0.032057 |
| 10343766 | --- | --- | 1.606978 | 0.684349895 | 0.033385 |
| 10343821 | --- | --- | 1.762087 | 0.817285061 | 0.03609  |
| 10343867 | --- | --- | 1.378319 | 0.462909937 | 0.044873 |
| 10343870 | --- | --- | 1.327659 | 0.408885002 | 0.021097 |
| 10343922 | --- | --- | 1.614783 | 0.691340208 | 0.029395 |
| 10344011 | --- | --- | 1.38173  | 0.466475487 | 0.019112 |
| 10344134 | --- | --- | 1.326597 | 0.407729626 | 0.031507 |
| 10344355 | --- | --- | 1.392739 | 0.477924824 | 0.030309 |
| 10344397 | --- | --- | 2.100372 | 1.070644975 | 0.049909 |
| 10344419 | --- | --- | 2.778083 | 1.474089861 | 0.038064 |
| 10344426 | --- | --- | 1.587003 | 0.666305065 | 0.018729 |
| 10344434 | --- | --- | 1.82187  | 0.865420222 | 0.010277 |
| 10344471 | --- | --- | 1.304024 | 0.382970095 | 0.045505 |
| 10344523 | --- | --- | 4.277522 | 2.096775174 | 0.035358 |
| 10347728 | --- | --- | 1.347528 | 0.430315018 | 0.029744 |
| 10411609 | --- | --- | 1.392421 | 0.477595329 | 0.034878 |
| 10452138 | --- | --- | 1.507032 | 0.591710091 | 0.036382 |
| 10423383 | --- | --- | 1.330331 | 0.411784887 | 0.027879 |
| 10348119 | --- | --- | 1.318968 | 0.39940989  | 7.21E-04 |
| 10345704 | --- | --- | 1.3243   | 0.405229807 | 0.032853 |
| 10520040 | --- | --- | 1.434775 | 0.520824909 | 0.005203 |
| 10504466 | --- | --- | 1.612099 | 0.688940048 | 0.011622 |
| 10552351 | --- | --- | 1.328179 | 0.409450054 | 0.015941 |
| 10595165 | --- | --- | 1.355913 | 0.439265013 | 0.020655 |
| 10434283 | --- | --- | 1.377847 | 0.462415218 | 0.039113 |
| 10427742 | --- | --- | 1.330557 | 0.412029982 | 0.030232 |
| 10562649 | --- | --- | 1.367803 | 0.451859951 | 0.032121 |
| 10563718 | --- | --- | 1.532211 | 0.615615129 | 0.002321 |
| 10531049 | --- | --- | 1.331692 | 0.413259983 | 0.019935 |
| 10598073 | --- | --- | 1.883629 | 0.913514853 | 0.028195 |
| 10509161 | --- | --- | 1.317114 | 0.397380114 | 0.024326 |

|          |     |     |          |             |          |
|----------|-----|-----|----------|-------------|----------|
| 10593167 | --- | --- | 1.362216 | 0.445955038 | 0.032234 |
| 10542371 | --- | --- | 1.417093 | 0.502934933 | 0.018801 |
| 10394938 | --- | --- | 1.335824 | 0.417729855 | 0.026705 |
| 10444995 | --- | --- | 1.525879 | 0.609640121 | 0.015345 |
| 10417702 | --- | --- | 1.477246 | 0.56291008  | 0.002818 |
| 10364371 | --- | --- | 1.534895 | 0.618140101 | 0.040686 |
| 10424381 | --- | --- | 1.486763 | 0.572174549 | 0.009046 |
| 10400708 | --- | --- | 1.447532 | 0.533595085 | 0.020113 |
| 10399657 | --- | --- | 1.335824 | 0.417729855 | 0.026705 |
| 10584582 | --- | --- | 1.517141 | 0.601354837 | 0.027428 |
| 10403071 | --- | --- | 1.42611  | 0.512085199 | 0.022015 |
| 10600810 | --- | --- | 1.311734 | 0.391475201 | 0.040011 |
| 10594513 | --- | --- | 1.440226 | 0.526294947 | 0.038166 |
| 10503148 | --- | --- | 1.380088 | 0.464759827 | 0.005426 |
| 10545513 | --- | --- | 1.322186 | 0.402924895 | 0.033134 |
| 10441751 | --- | --- | 1.356929 | 0.440345049 | 0.031161 |
| 10540287 | --- | --- | 1.424963 | 0.510924816 | 0.048536 |
| 10552343 | --- | --- | 1.316936 | 0.397185087 | 0.039797 |
| 10580981 | --- | --- | 1.310076 | 0.389650106 | 0.012525 |
| 10415011 | --- | --- | 1.557498 | 0.639230013 | 0.034426 |
| 10366583 | --- | --- | 1.301049 | 0.379674971 | 0.007086 |
| 10392822 | --- | --- | 1.358665 | 0.442189932 | 0.011954 |
| 10399720 | --- | --- | 1.347813 | 0.430619955 | 0.031804 |
