# Supplementary material for: Neuroprotective changes in degeneration-related gene expression in the substantia nigra following acupuncture in an MPTP mouse model of Parkinsonism: Microarray analysis
Source: PubMed Central journal article supplement — Genet Mol Biol. 2014 Mar 17;38(1):115–27. doi: 10.1590/S1415-475738120140137 (PMC4415566; doi:10.1590/s1415-475738120140137), 2014-03-17
Supplement: 1415-4757-gmb-38-1-115-suppl02.pdf [file 1415-4757-gmb-38-1-115-suppl02.pdf]

**Table S2** - Down-regulated genes in MPTP-treated substantia nigral region versus control substantia nigral region.

| Probe ID | Gene symbol   | Gene title                                                              | Average fold change | Average log 2 (Fold change) | P value  |
|----------|---------------|-------------------------------------------------------------------------|---------------------|-----------------------------|----------|
| 10593421 | 1110032A03Rik | RIKEN cDNA 1110032A03 gene                                              | 0.765556            | -0.38542                    | 0.024056 |
| 10537292 | 1810058I24Rik | RIKEN cDNA 1810058I24 gene                                              | 0.739981            | -0.43444                    | 0.017921 |
| 10438567 | 2310042E22Rik | RIKEN cDNA 2310042E22 gene                                              | 0.749611            | -0.41579                    | 0.017156 |
| 10416727 | 4921530L21Rik | RIKEN cDNA 4921530L21 gene                                              | 0.758931            | -0.39796                    | 0.022102 |
| 10419803 | 4931414P19Rik | RIKEN cDNA 4931414P19 gene                                              | 0.719943            | -0.47405                    | 0.004242 |
| 10584561 | 9030425E11Rik | RIKEN cDNA 9030425E11 gene                                              | 0.765806            | -0.38495                    | 0.027008 |
| 10584244 | 9230113P08Rik | RIKEN cDNA 9230113P08 gene                                              | 0.741714            | -0.43106                    | 0.011919 |
| 10592188 | 9230113P08Rik | RIKEN cDNA 9230113P08 gene                                              | 0.679959            | -0.55648                    | 0.048598 |
| 10403396 | Adarb2        | adenosine deaminase, RNA-specific, B2                                   | 0.767761            | -0.38127                    | 0.048102 |
| 10585467 | Agphd1        | aminoglycoside phosphotransferase domain containing 1                   | 0.734465            | -0.44524                    | 0.012609 |
| 10562605 | AI987944      | expressed sequence AI987944                                             | 0.677771            | -0.56113                    | 0.048536 |
| 10407445 | Akr1c12       | aldo-keto reductase family 1, member C12                                | 0.665777            | -0.58689                    | 0.024268 |
| 10595668 | Ankrd34c      | ankyrin repeat domain 34C                                               | 0.73011             | -0.45381                    | 0.038135 |
| 10410955 | Atp6ap11      | ATPase, H <sup>+</sup> transporting, lysosomal accessory protein 1-like | 0.633161            | -0.65935                    | 0.030804 |
| 10593751 | AY074887      | cDNA sequence AY074887                                                  | 0.706059            | -0.50214                    | 0.008343 |
| 10402598 | Begain        | brain-enriched guanylate kinase-associated                              | 0.761597            | -0.3929                     | 0.016465 |
| 10365590 | Ccdc53        | coiled-coil domain containing 53                                        | 0.746105            | -0.42255                    | 0.032431 |
| 10379530 | Ccl12         | chemokine (C-C motif) ligand 12                                         | 0.682918            | -0.55021                    | 0.038736 |
| 10432180 | Ccnt1         | cyclin T1                                                               | 0.76917             | -0.37862                    | 0.048295 |
| 10458382 | Cd14          | CD14 antigen                                                            | 0.658048            | -0.60373                    | 0.013247 |
| 10474223 | Cd59b         | CD59b antigen                                                           | 0.688969            | -0.53749                    | 0.039723 |
| 10503198 | Chd7          | chromodomain helicase DNA binding protein 7                             | 0.725851            | -0.46226                    | 0.024472 |
| 10593756 | Chrna3        | cholinergic receptor, nicotinic, alpha polypeptide 3                    | 0.677583            | -0.56153                    | 0.007298 |
| 10540333 | Cntn6         | contactin 6                                                             | 0.763688            | -0.38894                    | 0.008695 |
| 10369290 | Ddit4         | DNA-damage-inducible transcript 4                                       | 0.697558            | -0.51961                    | 0.049448 |
| 10488633 | Defb22        | defensin beta 22                                                        | 0.738423            | -0.43748                    | 0.005882 |
| 10577337 | Defb40        | defensin beta 40                                                        | 0.732403            | -0.44929                    | 0.007605 |
| 10545897 | Dusp11        | dual specificity phosphatase 11 (RNA/RNP complex 1-interacting)         | 0.764962            | -0.38654                    | 0.038452 |
| 10556938 | E130201H02Rik | Y box protein 1 pseudogene                                              | 0.721417            | -0.4711                     | 0.029512 |
| 10388734 | Eral1         | Era (G-protein)-like 1 (E. coli)                                        | 0.752882            | -0.4095                     | 0.048965 |
| 10498323 | Fam194a       | family with sequence similarity 194, member A                           | 0.735124            | -0.44394                    | 0.019026 |
| 10590438 | Fam198a       | family with sequence similarity 198, member A                           | 0.75946             | -0.39696                    | 0.046667 |
| 10594802 | Fam63b        | family with sequence similarity 63, member B                            | 0.763228            | -0.38981                    | 0.041767 |

|          |           |                                                                              |          |          |          |
|----------|-----------|------------------------------------------------------------------------------|----------|----------|----------|
| 10504534 | Frmpd1    | FERM and PDZ domain containing 1                                             | 0.698482 | -0.5177  | 0.014003 |
| 10502816 | Gipc2     | GIPC PDZ domain containing family, member 2                                  | 0.757115 | -0.40142 | 0.002579 |
| 10450951 | Glyat13   | glycine-N-acyltransferase-like 3                                             | 0.722265 | -0.4694  | 0.010171 |
| 10579049 | Gm10033   | predicted gene 10033                                                         | 0.695029 | -0.52486 | 0.028307 |
| 10594909 | Gm10641   | predicted gene 10641                                                         | 0.754637 | -0.40614 | 0.038436 |
| 10376425 | Gm12258   | predicted gene 12258                                                         | 0.734083 | -0.44598 | 0.004804 |
| 10485792 | Gm13931   | predicted gene 13931                                                         | 0.610738 | -0.71138 | 0.014808 |
| 10600733 | Gm5072    | predicted gene 5072                                                          | 0.731969 | -0.45015 | 0.001965 |
| 10591777 | Gm6607    | 40S ribosomal protein S20 pseudogene                                         | 0.737094 | -0.44008 | 0.028543 |
| 10586967 | Gm7265    | predicted gene 7265                                                          | 0.757299 | -0.40107 | 0.02751  |
| 10456353 | Grp       | gastrin releasing peptide                                                    | 0.72831  | -0.45737 | 0.049901 |
| 10500559 | Hsd3b6    | hydroxy-delta-5-steroid dehydrogenase, 3 beta- and steroid delta-isomerase 6 | 0.741331 | -0.43181 | 0.035635 |
| 10403023 | Ighv1-43  | immunoglobulin heavy variable V1-43                                          | 0.704983 | -0.50434 | 0.036704 |
| 10434845 | Il1rap    | interleukin 1 receptor accessory protein                                     | 0.767025 | -0.38266 | 0.030652 |
| 10367440 | Itga7     | integrin alpha 7                                                             | 0.737089 | -0.44009 | 0.042966 |
| 10462195 | Kank1     | KN motif and ankyrin repeat domains 1                                        | 0.744766 | -0.42514 | 0.037499 |
| 10548532 | Klra9     | killer cell lectin-like receptor subfamily A, member 9                       | 0.713139 | -0.48774 | 0.041302 |
| 10417704 | Lrrc3b    | leucine rich repeat containing 3B                                            | 0.739809 | -0.43477 | 0.003465 |
| 10372151 | Lrriq1    | leucine-rich repeats and IQ motif containing 1                               | 0.695578 | -0.52372 | 0.036319 |
| 10470296 | Mir126    | microRNA 126                                                                 | 0.750545 | -0.41399 | 0.038462 |
| 10350341 | Mir181b-1 | microRNA 181b-1                                                              | 0.635034 | -0.65509 | 0.005659 |
| 10479397 | Ntsr1     | neurotensin receptor 1                                                       | 0.736338 | -0.44156 | 0.038291 |
| 10484687 | Olfr1136  | olfactory receptor 1136                                                      | 0.731865 | -0.45035 | 0.046553 |
| 10556115 | Olfr472   | olfactory receptor 472                                                       | 0.744555 | -0.42555 | 0.045071 |
| 10555771 | Olfr592   | olfactory receptor 592                                                       | 0.717873 | -0.4782  | 0.021868 |
| 10367503 | Olfr790   | olfactory receptor 790                                                       | 0.757317 | -0.40103 | 0.019363 |
| 10591205 | Olfr862   | olfactory receptor 862                                                       | 0.70826  | -0.49765 | 0.031341 |
| 10584472 | Olfr926   | olfactory receptor 926                                                       | 0.643649 | -0.63566 | 0.012761 |
| 10542983 | Pon1      | paraoxonase 1                                                                | 0.758252 | -0.39925 | 0.046596 |
| 10542993 | Pon3      | paraoxonase 3                                                                | 0.758978 | -0.39787 | 0.044271 |
| 10362941 | Prep      | prolyl endopeptidase                                                         | 0.768858 | -0.37921 | 0.00518  |
| 10453715 | Rab18     | RAB18, member RAS oncogene family                                            | 0.666515 | -0.58529 | 0.020236 |
| 10548899 | Rerg      | RAS-like, estrogen-regulated, growth-inhibitor                               | 0.716548 | -0.48087 | 0.001814 |
| 10494527 | Rnf115    | ring finger protein 115                                                      | 0.762225 | -0.39171 | 0.026774 |
| 10511353 | Sdr16c6   | short chain dehydrogenase/reductase family 16C, member 6                     | 0.730474 | -0.45309 | 0.016102 |
| 10494369 | Sf3b4     | splicing factor 3b, subunit 4                                                | 0.663834 | -0.5911  | 0.025119 |
| 10362073 | Sgk1      | serum/glucocorticoid regulated kinase 1                                      | 0.439368 | -1.1865  | 0.034963 |

|          |          |                                                   |          |          |          |
|----------|----------|---------------------------------------------------|----------|----------|----------|
| 10515134 | Skint9   | selection and upkeep of intraepithelial T cells 9 | 0.709628 | -0.49487 | 0.044562 |
| 10522919 | Smr2     | submaxillary gland androgen regulated protein 2   | 0.667887 | -0.58232 | 0.023427 |
| 10356154 | Sphkap   | SPHK1 interactor, AKAP domain containing          | 0.759275 | -0.3973  | 0.040555 |
| 10600284 | Srpk3    | serine/arginine-rich protein specific kinase 3    | 0.704531 | -0.50526 | 6.30E-04 |
| 10369702 | Tet1     | tet methylcytosine dioxygenase 1                  | 0.720058 | -0.47381 | 0.043154 |
| 10601555 | Tgif2lx1 | TGFB-induced factor homeobox 2-like, X-linked 1   | 0.74595  | -0.42285 | 0.016433 |
| 10606548 | Tgif2lx1 | TGFB-induced factor homeobox 2-like, X-linked 1   | 0.762485 | -0.39122 | 0.03216  |
| 10504692 | Tmod1    | tropomodulin 1                                    | 0.757097 | -0.40145 | 0.020631 |
| 10362440 | Trdn     | triadin                                           | 0.547096 | -0.87014 | 3.67E-04 |
| 10475293 | Tubgcp4  | tubulin, gamma complex associated protein 4       | 0.762966 | -0.39031 | 0.006782 |
| 10410931 | Vcan     | versican                                          | 0.763574 | -0.38916 | 0.016274 |
| 10554748 | Vmn2r79  | vomeronal 2, receptor 79                          | 0.693429 | -0.52818 | 0.041308 |
| 10603881 | Zfp182   | zinc finger protein 182                           | 0.726611 | -0.46074 | 0.013037 |
| 10385656 | Zfp2     | zinc finger protein 2                             | 0.663827 | -0.59112 | 0.007777 |
| 10408047 | Zfp389   | zinc finger protein 389                           | 0.636711 | -0.65129 | 0.030083 |
| 10488459 | Zfp442   | zinc finger protein 442                           | 0.651242 | -0.61874 | 0.028554 |
| 10583450 | Zfp846   | zinc finger protein 846                           | 0.723949 | -0.46604 | 0.013418 |
| 10386394 | Zfp867   | zinc finger protein 867                           | 0.694285 | -0.5264  | 0.044225 |
| 10552264 | Zfp939   | zinc finger protein 939                           | 0.751229 | -0.41268 | 0.012932 |
| 10338217 | ---      | ---                                               | 0.588745 | -0.76429 | 0.023817 |
| 10338220 | ---      | ---                                               | 0.67548  | -0.56601 | 0.021227 |
| 10338240 | ---      | ---                                               | 0.588245 | -0.76551 | 0.04683  |
| 10338242 | ---      | ---                                               | 0.491807 | -1.02383 | 0.046413 |
| 10338252 | ---      | ---                                               | 0.596993 | -0.74422 | 0.011038 |
| 10338308 | ---      | ---                                               | 0.548098 | -0.8675  | 0.038464 |
| 10338361 | ---      | ---                                               | 0.590447 | -0.76012 | 0.046098 |
| 10338362 | ---      | ---                                               | 0.501715 | -0.99506 | 0.0345   |
| 10338497 | ---      | ---                                               | 0.466209 | -1.10095 | 0.049151 |
| 10338499 | ---      | ---                                               | 0.438077 | -1.19075 | 0.009937 |
| 10338501 | ---      | ---                                               | 0.622843 | -0.68306 | 0.04229  |
| 10338763 | ---      | ---                                               | 0.706918 | -0.50039 | 0.040038 |
| 10338833 | ---      | ---                                               | 0.702636 | -0.50915 | 0.022352 |
| 10338848 | ---      | ---                                               | 0.574045 | -0.80076 | 0.008639 |
| 10338881 | ---      | ---                                               | 0.449691 | -1.15299 | 0.011132 |
| 10338896 | ---      | ---                                               | 0.562812 | -0.82927 | 0.023734 |
| 10338951 | ---      | ---                                               | 0.69765  | -0.51943 | 0.006146 |
| 10339243 | ---      | ---                                               | 0.37439  | -1.41739 | 0.009134 |

|          |     |     |          |          |          |
|----------|-----|-----|----------|----------|----------|
| 10339247 | --- | --- | 0.757184 | -0.40128 | 0.030789 |
| 10339265 | --- | --- | 0.484459 | -1.04555 | 0.018271 |
| 10339270 | --- | --- | 0.3694   | -1.43674 | 0.005537 |
| 10339336 | --- | --- | 0.546624 | -0.87138 | 0.029912 |
| 10339412 | --- | --- | 0.676818 | -0.56316 | 0.030793 |
| 10339413 | --- | --- | 0.667975 | -0.58213 | 0.035173 |
| 10339434 | --- | --- | 0.255252 | -1.97001 | 0.015015 |
| 10339441 | --- | --- | 0.671124 | -0.57535 | 0.048511 |
| 10339463 | --- | --- | 0.472547 | -1.08147 | 0.02745  |
| 10339655 | --- | --- | 0.729955 | -0.45412 | 0.030669 |
| 10339666 | --- | --- | 0.733778 | -0.44659 | 0.036675 |
| 10339753 | --- | --- | 0.699941 | -0.51469 | 0.034871 |
| 10339817 | --- | --- | 0.564363 | -0.8253  | 0.027823 |
| 10339866 | --- | --- | 0.404291 | -1.30654 | 0.043026 |
| 10339958 | --- | --- | 0.384068 | -1.38057 | 0.04451  |
| 10339964 | --- | --- | 0.65873  | -0.60224 | 0.023153 |
| 10340024 | --- | --- | 0.388129 | -1.36539 | 0.009335 |
| 10340029 | --- | --- | 0.58509  | -0.77327 | 0.031079 |
| 10340069 | --- | --- | 0.745334 | -0.42404 | 0.002048 |
| 10340113 | --- | --- | 0.584407 | -0.77496 | 0.004559 |
| 10340139 | --- | --- | 0.667075 | -0.58408 | 0.011205 |
| 10340182 | --- | --- | 0.269854 | -1.88975 | 0.00589  |
| 10340201 | --- | --- | 0.652349 | -0.61629 | 0.011339 |
| 10340246 | --- | --- | 0.682379 | -0.55136 | 0.02714  |
| 10340252 | --- | --- | 0.398916 | -1.32584 | 0.020474 |
| 10340276 | --- | --- | 0.506202 | -0.98221 | 0.001258 |
| 10340352 | --- | --- | 0.713463 | -0.48709 | 0.020557 |
| 10340387 | --- | --- | 0.769117 | -0.37873 | 0.026454 |
| 10340399 | --- | --- | 0.531058 | -0.91306 | 0.022747 |
| 10340508 | --- | --- | 0.596773 | -0.74475 | 0.010562 |
| 10340512 | --- | --- | 0.592009 | -0.75631 | 0.030613 |
| 10340514 | --- | --- | 0.375767 | -1.41209 | 0.001691 |
| 10340548 | --- | --- | 0.485464 | -1.04257 | 0.003175 |
| 10340557 | --- | --- | 0.426103 | -1.23073 | 0.012976 |
| 10340611 | --- | --- | 0.694894 | -0.52513 | 0.01117  |
| 10340671 | --- | --- | 0.273337 | -1.87124 | 0.001513 |
| 10340709 | --- | --- | 0.750766 | -0.41356 | 0.0231   |
| 10340718 | --- | --- | 0.765301 | -0.3859  | 0.011778 |
| 10340724 | --- | --- | 0.166361 | -2.58761 | 0.003005 |
| 10340752 | --- | --- | 0.649225 | -0.62321 | 0.039046 |

|          |     |     |          |          |          |
|----------|-----|-----|----------|----------|----------|
| 10340828 | --- | --- | 0.725806 | -0.46234 | 0.023749 |
| 10340838 | --- | --- | 0.719272 | -0.47539 | 0.041464 |
| 10340839 | --- | --- | 0.512083 | -0.96555 | 0.021275 |
| 10340913 | --- | --- | 0.629289 | -0.6682  | 0.035431 |
| 10341004 | --- | --- | 0.230021 | -2.12016 | 0.018725 |
| 10341005 | --- | --- | 0.761853 | -0.39242 | 0.042871 |
| 10341014 | --- | --- | 0.584453 | -0.77484 | 5.46E-04 |
| 10341095 | --- | --- | 0.570062 | -0.81081 | 0.003084 |
| 10341208 | --- | --- | 0.71418  | -0.48564 | 0.02689  |
| 10341229 | --- | --- | 0.749017 | -0.41693 | 0.006646 |
| 10341355 | --- | --- | 0.563442 | -0.82766 | 0.009424 |
| 10341363 | --- | --- | 0.607567 | -0.71888 | 0.027063 |
| 10341368 | --- | --- | 0.306851 | -1.70439 | 0.007193 |
| 10341409 | --- | --- | 0.503216 | -0.99075 | 0.010937 |
| 10341436 | --- | --- | 0.697974 | -0.51876 | 0.005684 |
| 10341534 | --- | --- | 0.53068  | -0.91408 | 0.044037 |
| 10341584 | --- | --- | 0.51596  | -0.95467 | 0.02136  |
| 10341589 | --- | --- | 0.618714 | -0.69266 | 0.043304 |
| 10341752 | --- | --- | 0.689236 | -0.53693 | 0.018603 |
| 10341787 | --- | --- | 0.748192 | -0.41852 | 0.001939 |
| 10341934 | --- | --- | 0.692173 | -0.5308  | 0.02057  |
| 10341978 | --- | --- | 0.705667 | -0.50294 | 0.044756 |
| 10342038 | --- | --- | 0.573637 | -0.80179 | 0.019788 |
| 10342124 | --- | --- | 0.398189 | -1.32848 | 0.010297 |
| 10342141 | --- | --- | 0.437976 | -1.19108 | 0.026531 |
| 10342220 | --- | --- | 0.724755 | -0.46444 | 0.042762 |
| 10342244 | --- | --- | 0.577913 | -0.79107 | 0.03982  |
| 10342265 | --- | --- | 0.607796 | -0.71834 | 0.032727 |
| 10342272 | --- | --- | 0.659219 | -0.60117 | 0.046481 |
| 10342330 | --- | --- | 0.747943 | -0.419   | 0.005136 |
| 10342380 | --- | --- | 0.558136 | -0.84131 | 0.034145 |
| 10342476 | --- | --- | 0.522691 | -0.93597 | 0.03612  |
| 10342512 | --- | --- | 0.521509 | -0.93923 | 0.046526 |
| 10342519 | --- | --- | 0.578482 | -0.78966 | 0.020606 |
| 10342538 | --- | --- | 0.616922 | -0.69684 | 0.02351  |
| 10342645 | --- | --- | 0.464833 | -1.10521 | 0.013949 |
| 10342648 | --- | --- | 0.529776 | -0.91654 | 0.005648 |
| 10342786 | --- | --- | 0.644204 | -0.63441 | 0.031913 |
| 10342853 | --- | --- | 0.46742  | -1.09721 | 0.010914 |
| 10342926 | --- | --- | 0.73376  | -0.44662 | 0.009812 |

|          |     |     |          |          |          |
|----------|-----|-----|----------|----------|----------|
| 10342975 | --- | --- | 0.479644 | -1.05996 | 0.001537 |
| 10343007 | --- | --- | 0.668878 | -0.58019 | 0.04525  |
| 10343091 | --- | --- | 0.577761 | -0.79145 | 0.047315 |
| 10343119 | --- | --- | 0.536087 | -0.89946 | 0.01123  |
| 10343143 | --- | --- | 0.598594 | -0.74035 | 0.03869  |
| 10343157 | --- | --- | 0.634356 | -0.65663 | 0.043936 |
| 10343191 | --- | --- | 0.451002 | -1.14879 | 0.033643 |
| 10343202 | --- | --- | 0.543371 | -0.87999 | 0.009678 |
| 10343260 | --- | --- | 0.674105 | -0.56895 | 0.034777 |
| 10343283 | --- | --- | 0.763481 | -0.38933 | 0.049428 |
| 10343313 | --- | --- | 0.646208 | -0.62993 | 0.021569 |
| 10343349 | --- | --- | 0.261357 | -1.93591 | 0.042254 |
| 10343417 | --- | --- | 0.664375 | -0.58993 | 0.007717 |
| 10343441 | --- | --- | 0.504522 | -0.98701 | 0.006828 |
| 10343473 | --- | --- | 0.71595  | -0.48207 | 0.005619 |
| 10343483 | --- | --- | 0.747901 | -0.41908 | 0.037386 |
| 10343551 | --- | --- | 0.244643 | -2.03125 | 0.023397 |
| 10343553 | --- | --- | 0.482018 | -1.05284 | 0.022352 |
| 10343566 | --- | --- | 0.446249 | -1.16408 | 0.028812 |
| 10343612 | --- | --- | 0.764917 | -0.38662 | 0.009713 |
| 10343649 | --- | --- | 0.674224 | -0.5687  | 0.039127 |
| 10343667 | --- | --- | 0.518572 | -0.94739 | 0.009024 |
| 10343676 | --- | --- | 0.675211 | -0.56659 | 0.027202 |
| 10343684 | --- | --- | 0.490811 | -1.02676 | 0.042401 |
| 10343692 | --- | --- | 0.742555 | -0.42943 | 0.041881 |
| 10343722 | --- | --- | 0.531857 | -0.91089 | 0.007035 |
| 10343741 | --- | --- | 0.766817 | -0.38305 | 0.032398 |
| 10343755 | --- | --- | 0.70458  | -0.50516 | 0.047168 |
| 10343912 | --- | --- | 0.561474 | -0.83271 | 0.026546 |
| 10343920 | --- | --- | 0.573691 | -0.80166 | 0.04935  |
| 10344060 | --- | --- | 0.678408 | -0.55977 | 0.009954 |
| 10344100 | --- | --- | 0.580859 | -0.78374 | 0.009818 |
| 10344102 | --- | --- | 0.40433  | -1.30639 | 0.015351 |
| 10344182 | --- | --- | 0.547705 | -0.86853 | 0.00982  |
| 10344428 | --- | --- | 0.466242 | -1.10085 | 0.039694 |
| 10344440 | --- | --- | 0.733096 | -0.44793 | 0.027419 |
| 10344449 | --- | --- | 0.681809 | -0.55256 | 0.017512 |
| 10344524 | --- | --- | 0.378035 | -1.40341 | 0.010912 |
| 10344580 | --- | --- | 0.577857 | -0.79121 | 0.046273 |
| 10344591 | --- | --- | 0.603257 | -0.72916 | 0.026356 |

|          |     |     |          |          |          |
|----------|-----|-----|----------|----------|----------|
| 10344601 | --- | --- | 0.695925 | -0.523   | 0.035569 |
| 10348943 | --- | --- | 0.681028 | -0.55421 | 0.038105 |
| 10369234 | --- | --- | 0.740232 | -0.43395 | 0.016449 |
| 10385477 | --- | --- | 0.711968 | -0.49011 | 0.016101 |
| 10397000 | --- | --- | 0.686464 | -0.54274 | 0.03232  |
| 10398317 | --- | --- | 0.69794  | -0.51883 | 0.033273 |
| 10399426 | --- | --- | 0.661684 | -0.59579 | 0.041607 |
| 10400557 | --- | --- | 0.654207 | -0.61218 | 0.00549  |
| 10406493 | --- | --- | 0.765312 | -0.38588 | 0.016294 |
| 10408636 | --- | --- | 0.636459 | -0.65186 | 0.03198  |
| 10428615 | --- | --- | 0.745244 | -0.42422 | 0.04533  |
| 10440591 | --- | --- | 0.715773 | -0.48243 | 0.026304 |
| 10449545 | --- | --- | 0.707048 | -0.50012 | 0.012614 |
| 10469579 | --- | --- | 0.76025  | -0.39546 | 0.031572 |
| 10484673 | --- | --- | 0.697998 | -0.51871 | 0.02024  |
| 10503008 | --- | --- | 0.737457 | -0.43937 | 0.013976 |
| 10505252 | --- | --- | 0.704597 | -0.50513 | 0.042929 |
| 10507326 | --- | --- | 0.577029 | -0.79329 | 0.030243 |
| 10528198 | --- | --- | 0.763256 | -0.38976 | 0.042237 |
| 10536607 | --- | --- | 0.702617 | -0.50919 | 0.019805 |
| 10567428 | --- | --- | 0.750363 | -0.41434 | 0.041037 |
| 10567430 | --- | --- | 0.738682 | -0.43698 | 0.002744 |
| 10567502 | --- | --- | 0.610499 | -0.71194 | 0.025439 |
| 10567962 | --- | --- | 0.752154 | -0.4109  | 0.043089 |
| 10571772 | --- | --- | 0.732299 | -0.4495  | 0.003233 |
| 10584069 | --- | --- | 0.746935 | -0.42094 | 0.026458 |
| 10608249 | --- | --- | 0.414293 | -1.27127 | 0.041225 |
| 10608662 | --- | --- | 0.767445 | -0.38186 | 0.03314  |
