# Supplementary figures and images for: Neuroprotective changes in degeneration-related gene expression in the substantia nigra following acupuncture in an MPTP mouse model of Parkinsonism: Microarray analysis
Source: PubMed Central journal article supplement — Genet Mol Biol. 2014 Mar 17;38(1):115–27. doi: 10.1590/S1415-475738120140137 (PMC4415566; doi:10.1590/s1415-475738120140137), 2014-03-17

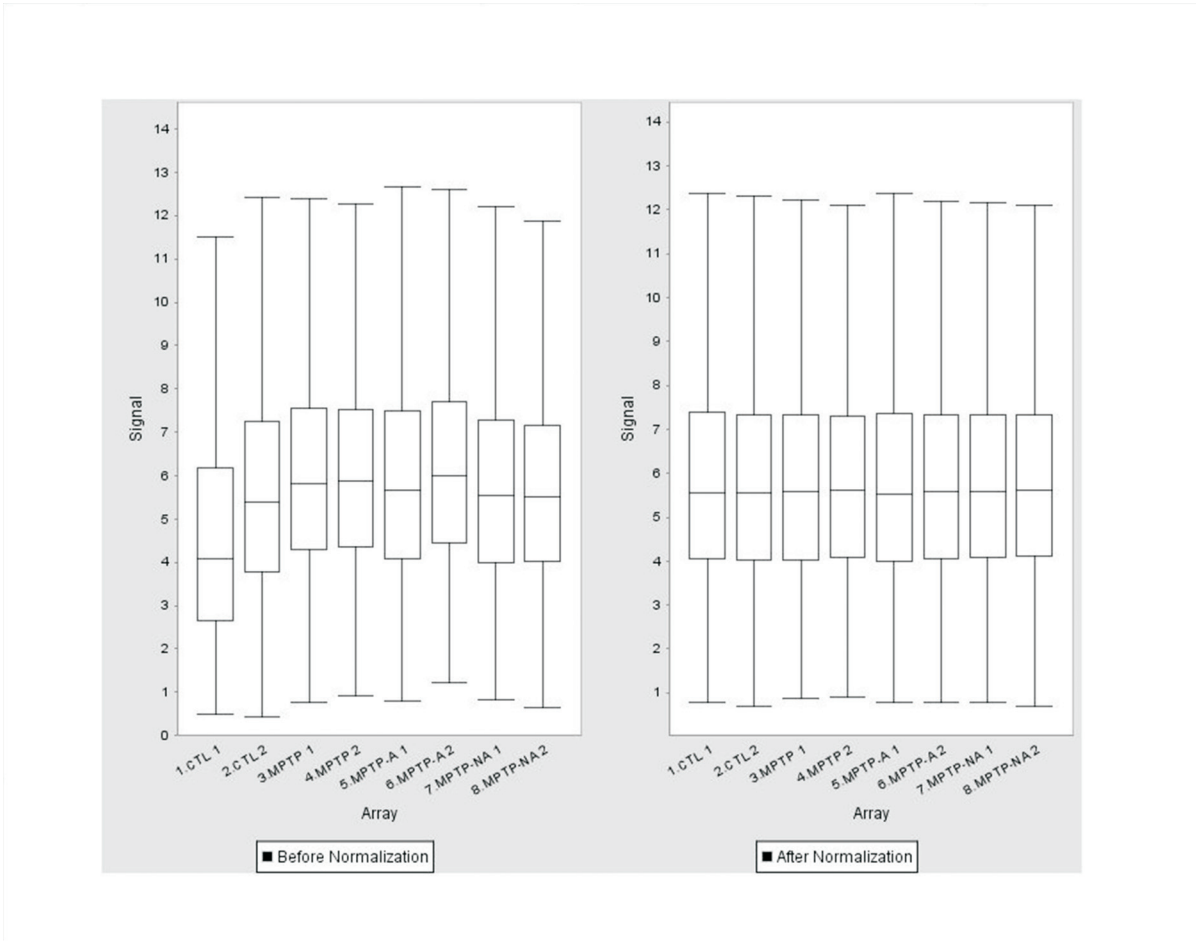

Figure S1 - Box plot before and after normalization.

Supplement: 1415-4757-gmb-38-1-115-suppl03.pdf [file 1415-4757-gmb-38-1-115-suppl03.pdf]
